# Supplementary material
Source: ML conference proceedings conference paper supplement (https://openaccess.thecvf.com/content/cvpr_2016/html/Koh_POD_Discovering_Primary_2016_CVPR_paper.html)
Supplement: Supplementary file 1 [file Koh_POD_Discovering_Primary_2016_CVPR_supplemental.pdf]

**Supplemental Materials on**  
**POD: Discovering Primary Objects in Videos Based on Evolutionary Refinement**  
**of Object Recurrence, Background, and Primary Object Models**

Yeong Jun Koh  
Korea University  
yjkoh@mcl.korea.ac.kr

Won-Dong Jang  
Korea University  
wdjang@mcl.korea.ac.kr

Chang-Su Kim  
Korea University  
changasukim@korea.ac.kr

**S-1. Experimental Results on YouTube-Objects Dataset**

Figures **S-1~S-3** show primary object discovery results of the proposed POD algorithm on the YouTube-Objects dataset.

**S-2. More Primary Object Discovery Results on POV dataset**

Figures **S-4** compares more primary object discovery results on the POV dataset.

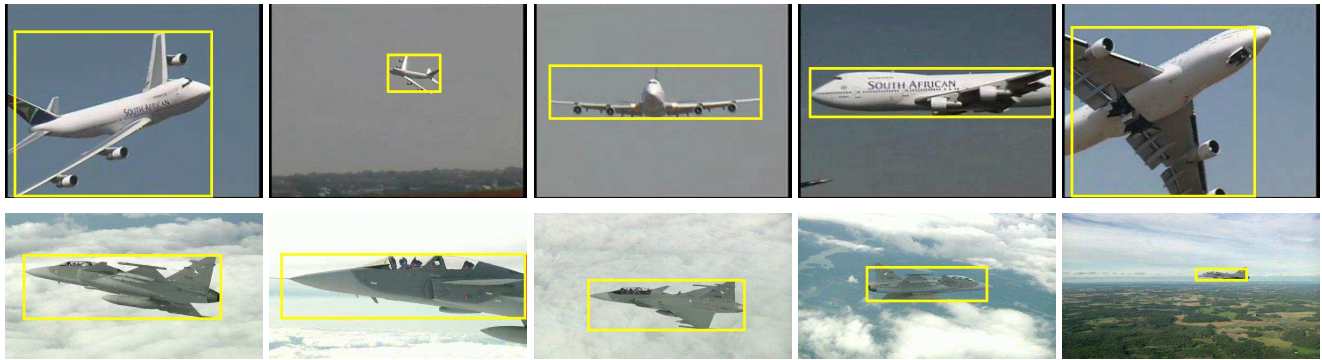

(a) Aeroplane

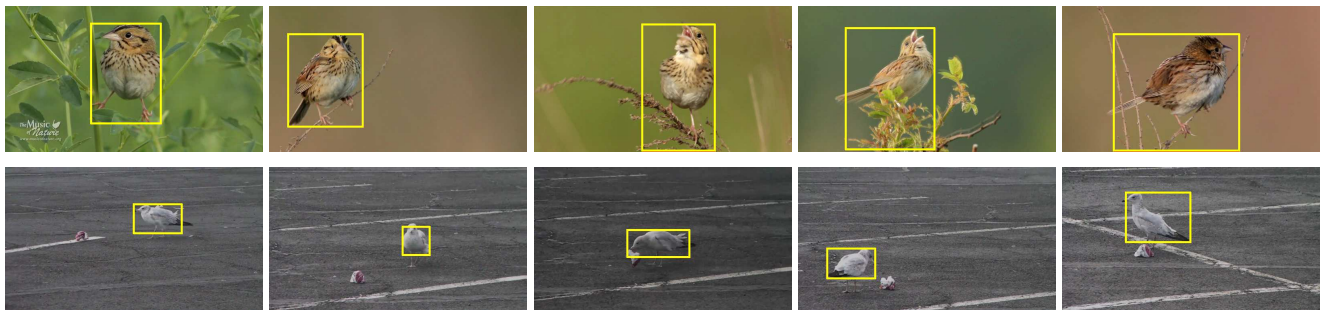

(b) Bird

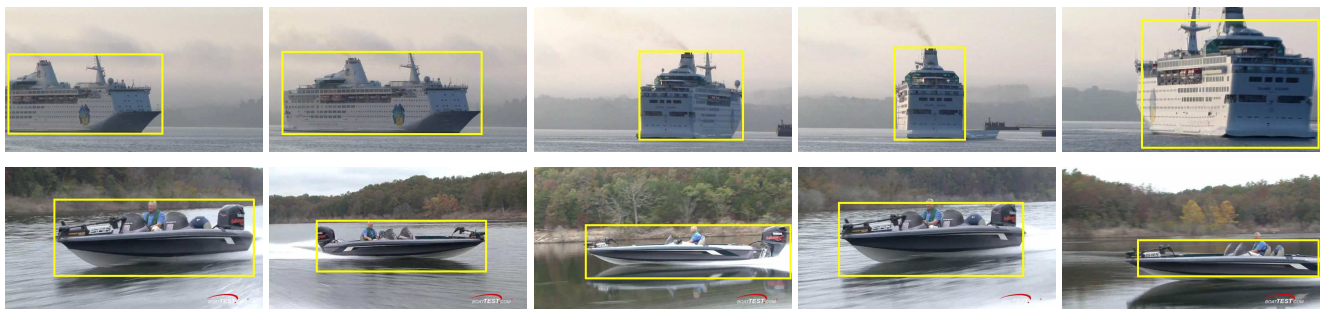

(c) Boat

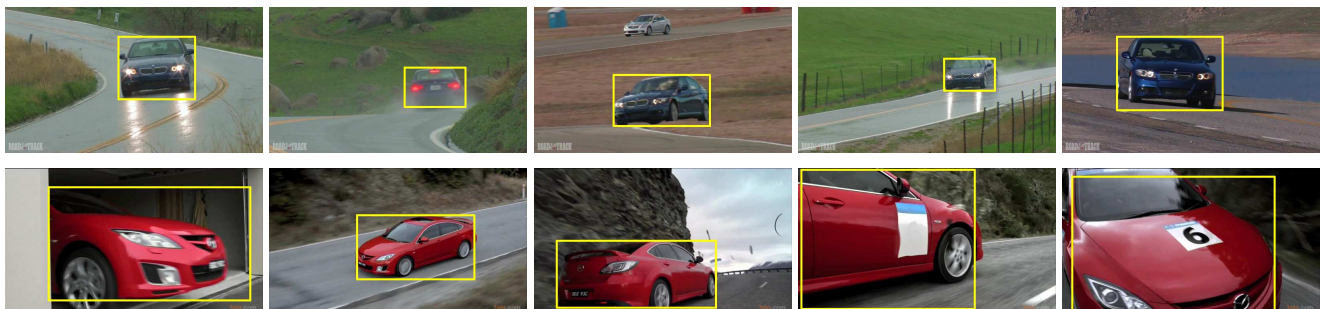

(d) Car

Figure S-1. Primary object discovery results on the YouTube-Objects dataset: (a) “Aeroplane,” (b) “Bird,” (c) “Boat,” and (d) “Car” classes. In each subfigure, different rows show primary object discovery results for different videos.



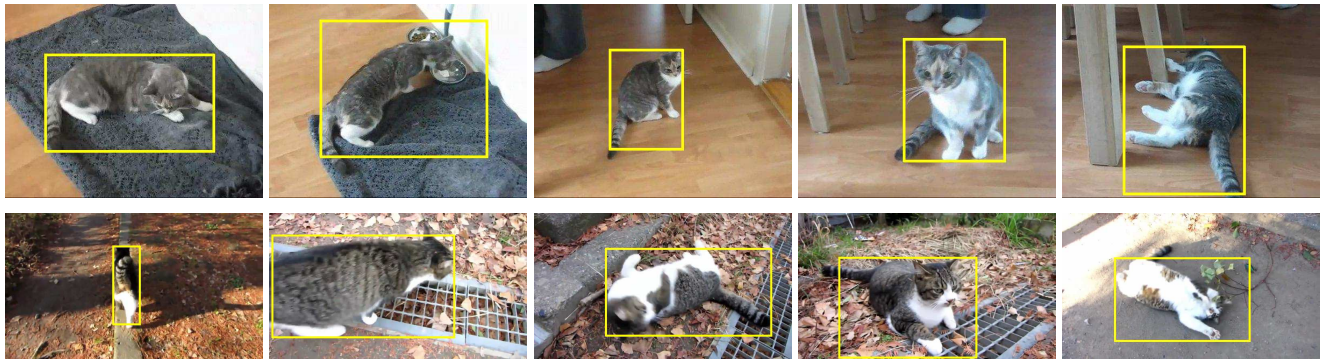

(a) Cat

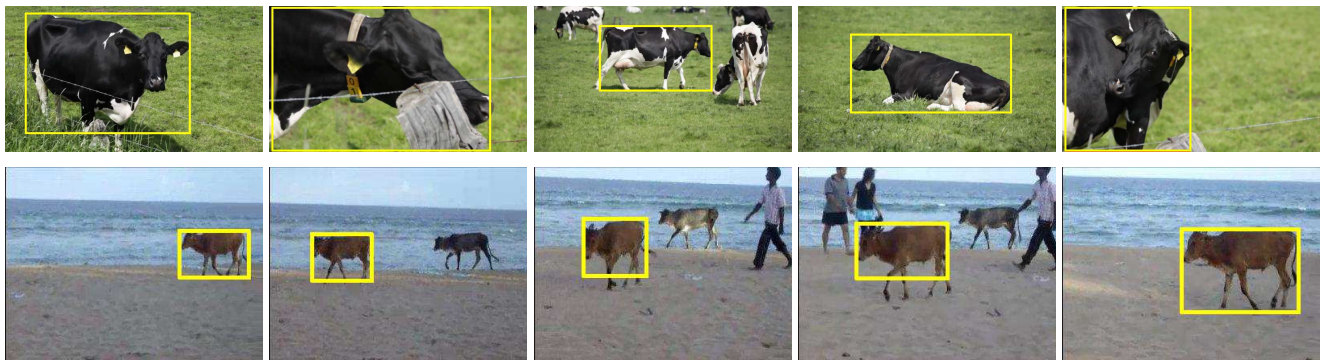

(b) Cow

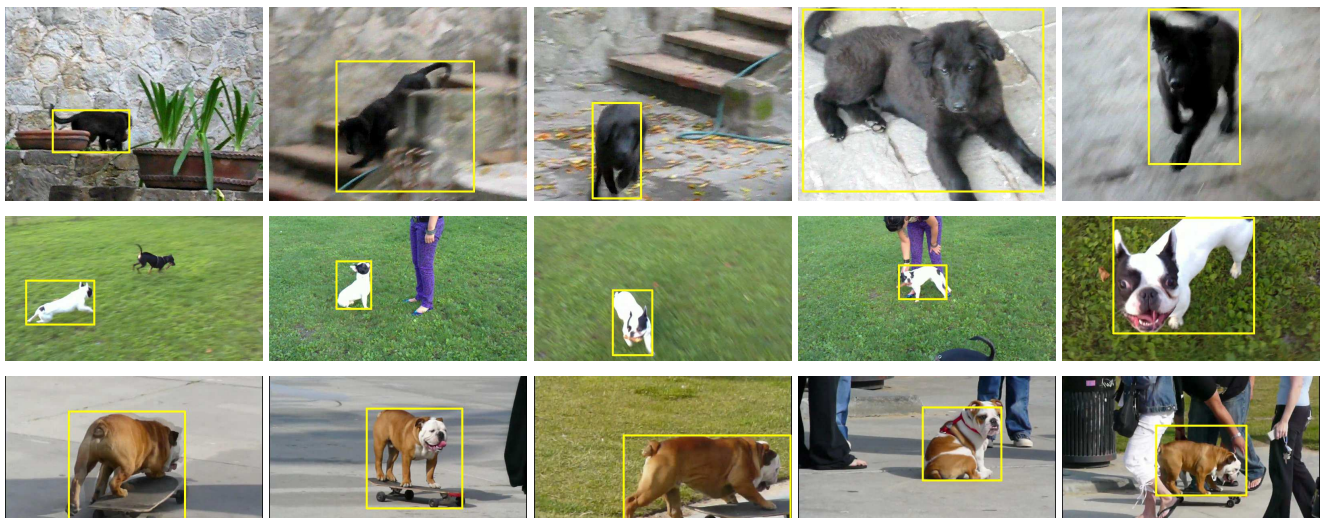

(c) Dog

Figure S-2. Primary object discovery results on the YouTube-Objects dataset: (a) “Cat,” (b) “Cow,” and (c) “Dog” classes. In each subfigure, different rows show primary object discovery results for different videos.



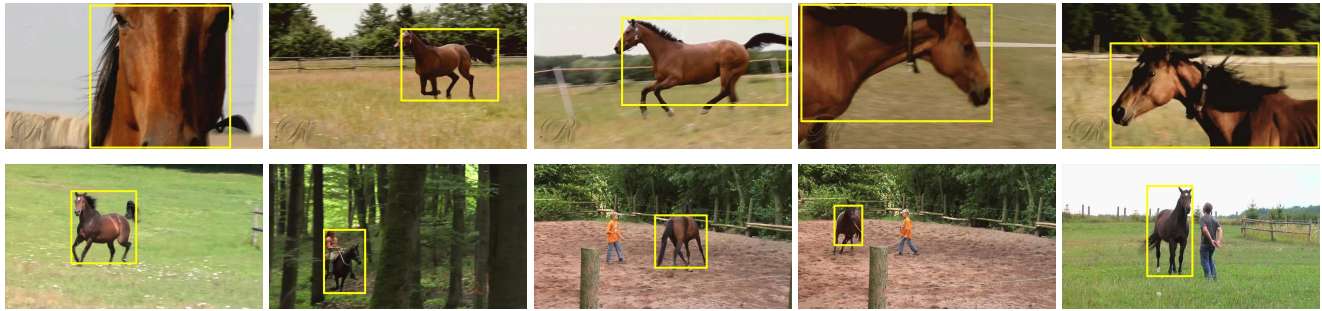

(a) Horse

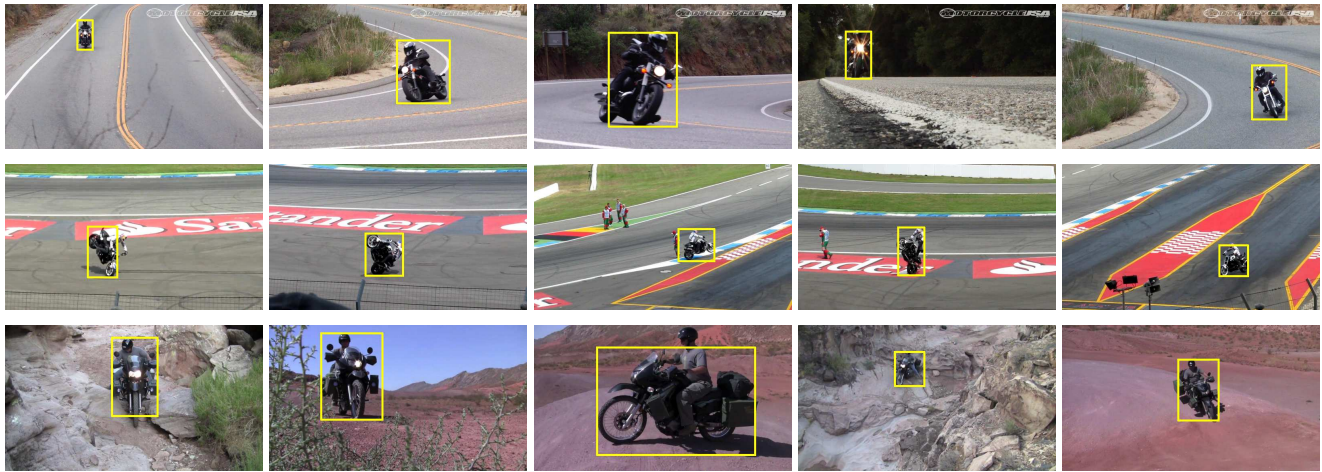

(b) Motorbike

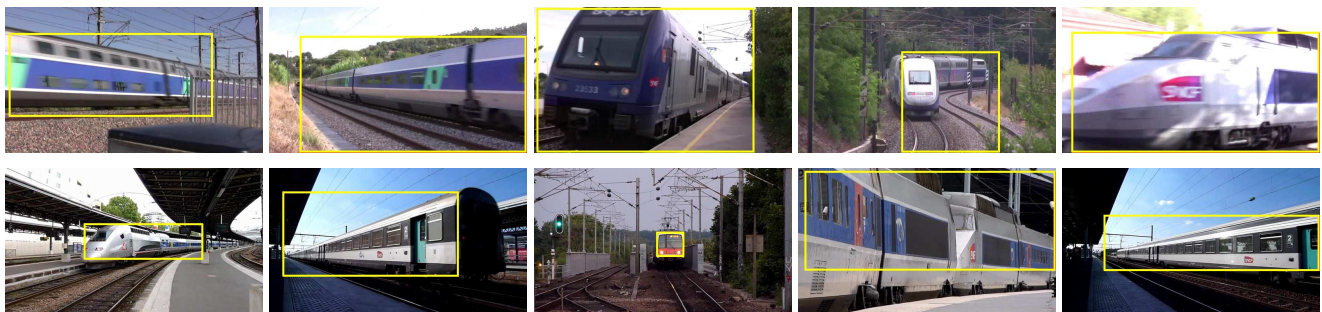

(c) Train

Figure S-3. Primary object discovery results on the YouTube-Objects dataset: (a) “Horse,” (b) “Motorbike,” and (c) “Train” classes. In each subfigure, different rows show primary object discovery results for different videos.



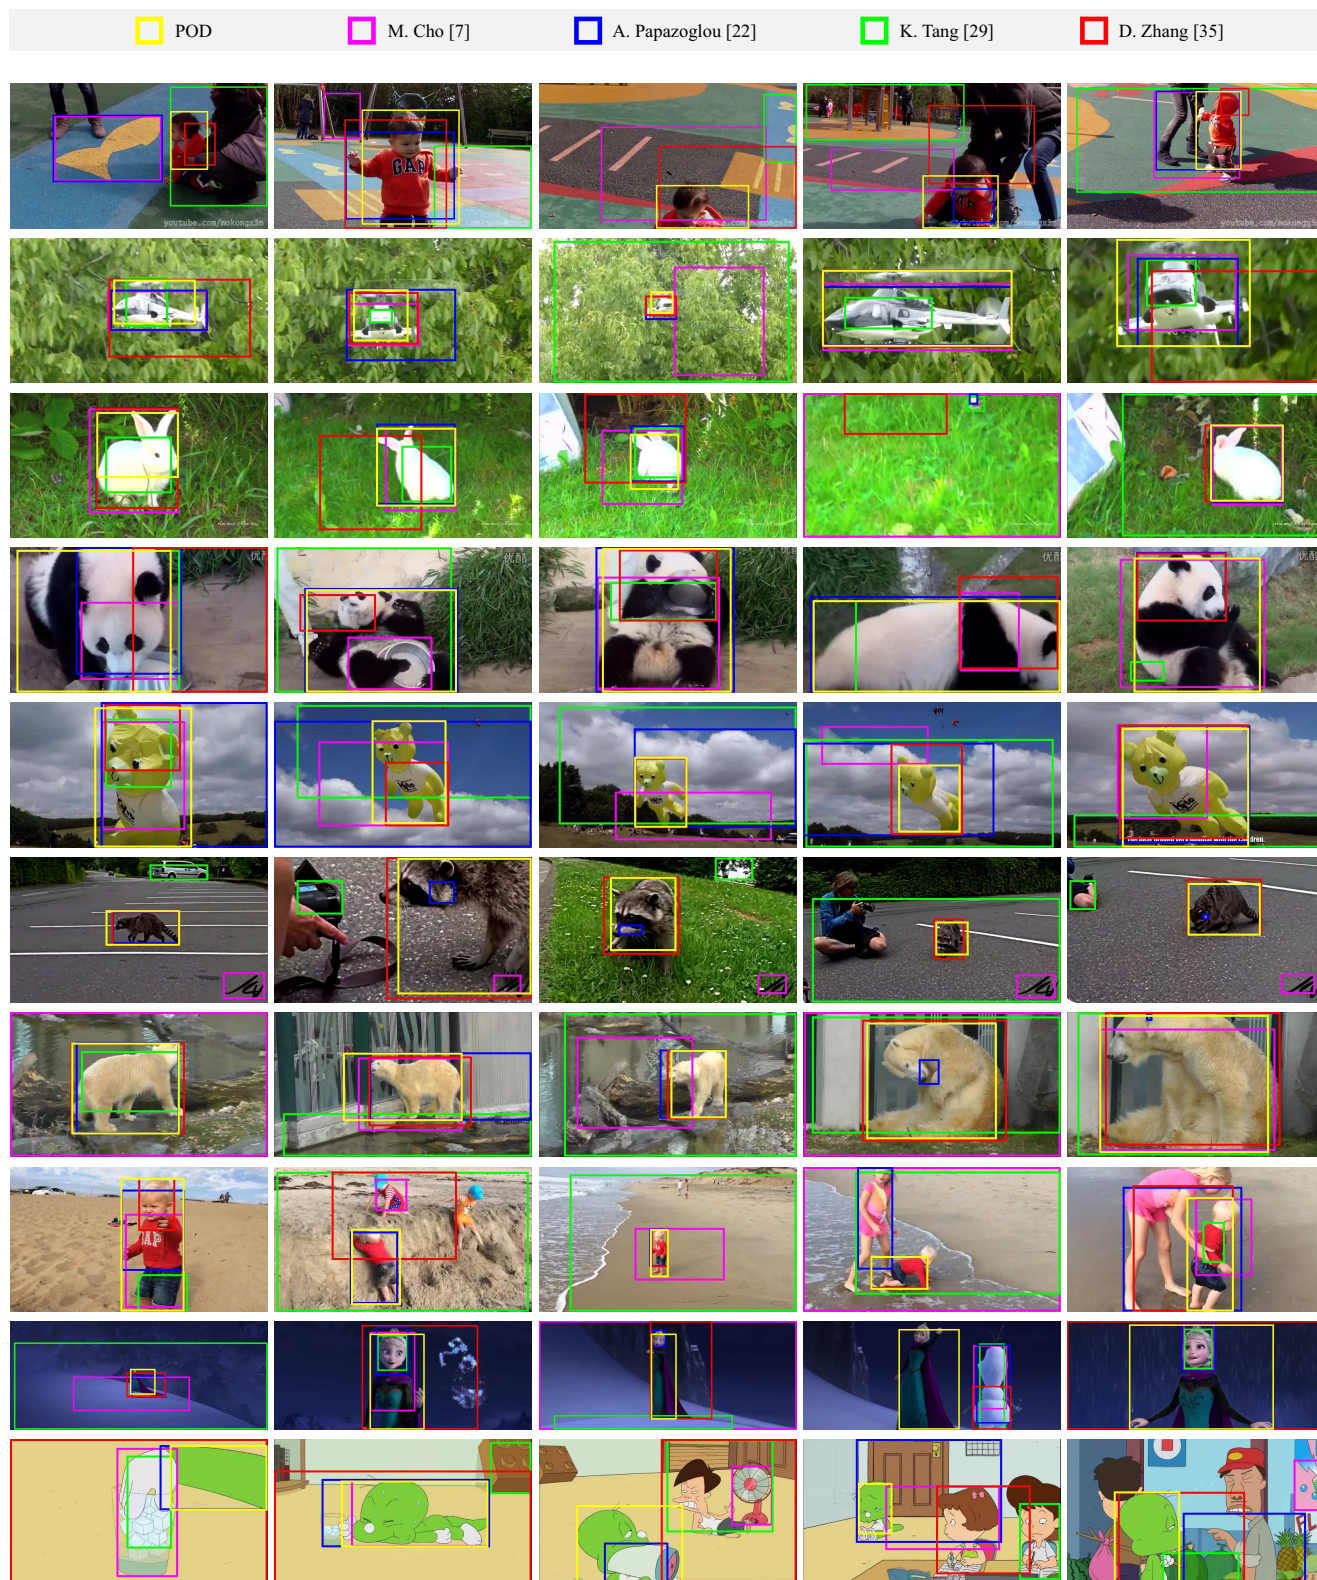

Figure S-4. More primary object discovery results on the POV dataset. Top to bottom: “Baby,” “Helicopter,” “Rabbit,” “Babypanda,” “Yellow Bear,” “Raccoon,” “Polarbear,” “Baby2,” “Frozen,” and “Dooly.”
